# Supplementary material for: Impact of chronic co-infection in pulmonary Mycobacterium avium complex disease after treatment initiation
Source: Research Square preprint supplement (doi:10.21203/rs.3.rs-1253953/v1), 2022-01-31
Supplement: Supplementary file 1 [file c7ea7456f176761eb792a98a.xlsx]

## Sheet: Table_1
	Table 1. Clinical characteristics of the MAC and co-infection groups
	Characteristic		Total	MAC group	Co-infection group	P value
	No. of patients		48	36	12
	Age: (years) mean±SD		69.2±10.8	68.3±11.8	72.1±6.9	0.195
	Gender: female; n (%)		39 (81.3)	29 (80.6)	10 (83.3)	1
	BMI: (kg/m2) mean±SD		18.9±3.2	19.2±3.3	18.2±2.5	0.301
	Smoking: never; n (%)		35 (72.9)	25 (69.4)	10 (83.3)	0.469
	Positive result for GPL-core serum IgA: n (%)		38 (79.2)	28 (77.8)	10 (83.3)	1
	Comorbidities: n (%)
	Rheumatoid arthritis (RA)		10 (20.8)	8 (22.2)	2 (16.7)	1
	Sinusitis		4 (8.3)	3 (8.3)	1 (8.3)	1
	Underlying pulmonary disease: n (%)
	Emphysema		6 (12.5)	5 (13.9)	1 (8.3)	1
	Interstitial pneumonia		8 (16.7)	7 (19.4)	1 (8.3)	0.659
	Chest CT imaging results
	Chest CT score; mean±SD		9.9±4.2	9.1±4.1	12.6±3.3	0.007
	Bronchiectasis lesion score in chest CT score		2.6±1.8	2.3±1.6	3.7±1.9	0.035
	Cavity lesion score in chest CT score		0.9±1.4	1.0±1.5	0.4±0.9	0.117
	Cavitary lesion; n (%)		21 (43.8)	18 (50)	3 (25)	0.185
	Radiographic pattern; n (%)
	NB form		27 (56.3)	18 (50)	9 (75)	0.315
	FC form		6 (12.5)	6 (16.7)	0	0.315
	NB＋FC form		15 (31.3)	12 (33.3)	3 (25)	0.728
	Subjective symptoms
	CAT score		8.7±6.8	7.9±6.6	11.1±7.2	0.211
	Cough ＋ Sputum score a		3.1±2.5	2.4±2.0	5.2±2.6	0.005
	Cough score a		1.6±1.3	1.3±1.2	2.5±1.4	0.015
	Sputum score a		1.5±1.4	1.1±1.0	2.6±1.8	0.021
	Concomitant drug; n (%)
	Corticosteroids		8 (16.7)	6 (16.7)	2 (16.7)	1
	Immunosuppressant		9 (18.8)	7 (19.4)	2 (16.7)	1
	Biopharmaceutical		1 (2.1)	1 (2.8)	0	1
	Infective MAC strain; n (%)
	M. avium		36 (75)	29 (80.6)	7 (58.3)	0.143
	M. intracellulare		16 (33.3)	10 (27.8)	6 (50)	0.178
	With sputum; n (%)
	Positive MAC culture		32 (66.6)	25 (69.4)	7 (58.3)	0.5
	With bronchoscopy; n (%)
	Positive culture of MAC		35/36 (97.2)	27/28 (96.4)	6/6 (100)	1
	Co-infection at baseline: n(%)		20 (41.7)	14(38.9)	6 (50)	0.52
	With sputum		10 (20.8)	6 (16.7)	4 (33.3)	0.241
	With bronchoscopy		14/33 (42.4)	11/28 (39.3)	3/6 (50)	0.672
	CAM resistant strain: n(%)
	At baseline		2 (4.2)	1 (2.8)	1 (8.3)	0.441
	24 months after treatment initiation		4 (8.3)	3 (8.3)	1 (8.3)	1
	Treatment for MAC: n(%)
	CAM/EB/RFP		39 (81.3)	29 (80.6)	10 (83.3)	1
	CAM/EB		6 (12.5)	6 (16.7)	0	0.315
	Other		3 (6.3)	1 (2.8)	2 (16.7)	0.156
	Treatment sucsess: n(%)		39 (81.2)	30 (83.3)	9 (75)	0.671
	MAC, Mycobacterium avium complex; CT, Computed tomography; BMI, Body Mass Index; CAT, COPD assessment test;
	GPL, glycopeptidolipid; NB, nodular bronchiectatic; FC, fibrocavitary; CAM, Clarithromycin; EB, Ethambutol; RFP, Rifampicin.
	a, Score for subjective symptoms of cough and sputum, included in CAT score.
